# Supplementary material
Source: MDPI journal article supplement (https://www.mdpi.com/2077-0472/12/8/1261)
Supplement: s1 [file s1]

**Supplementary Materials:** The following supporting information can be downloaded at: .

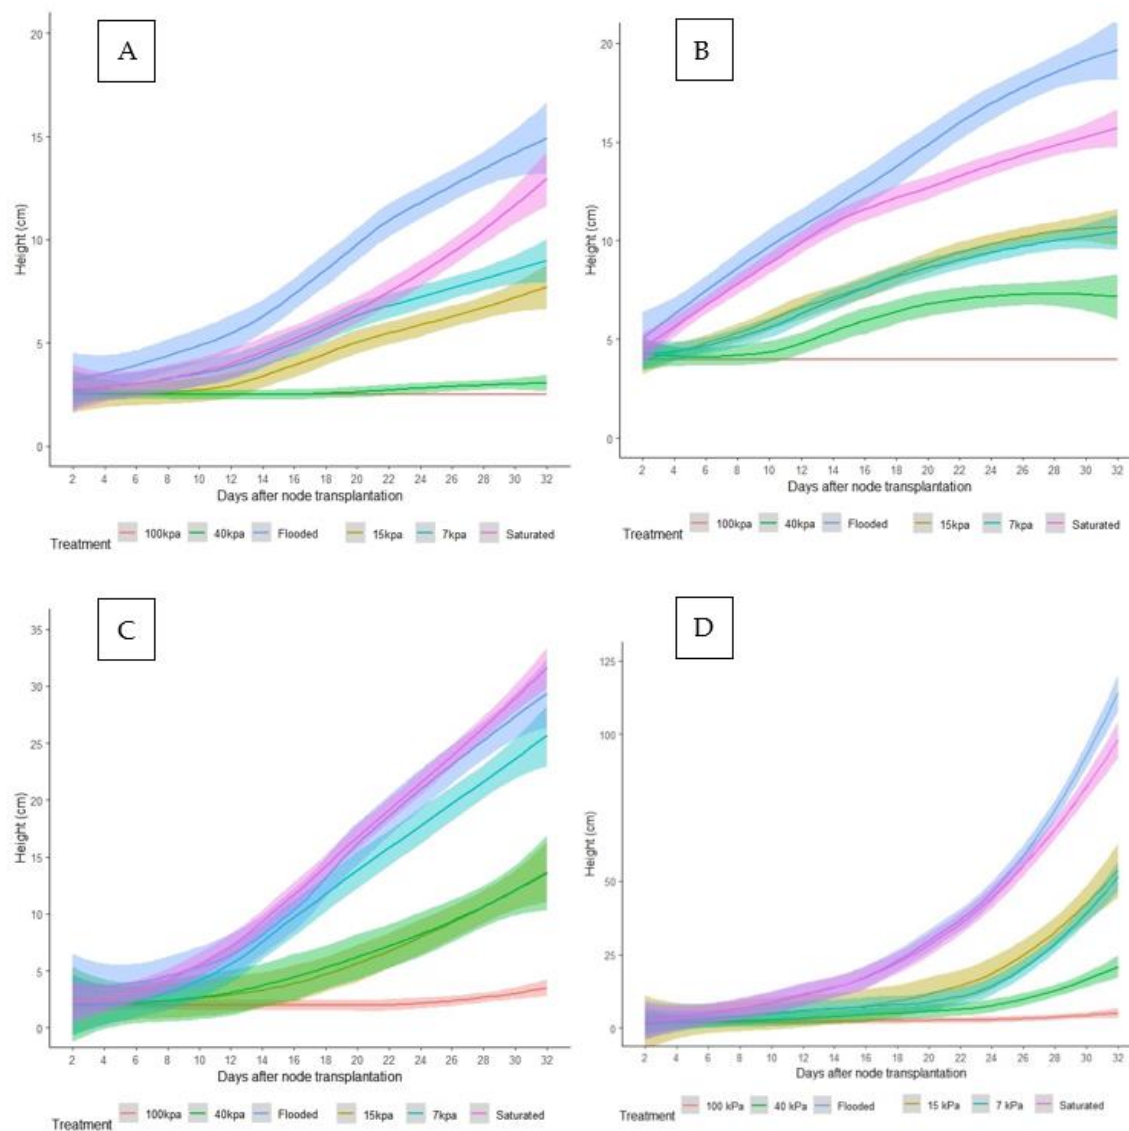

**Figure S1.** Plant length (cm) of *Leersia hexandra* (A and C) and *Luziola peruviana* (B and D) at different soil moisture levels in 2017/18 (A-B) and 2018/19 (C-D) growing seasons. Smoothing lines represent the observed values ( $n=16$ ) with confidence intervals ( $P \leq 0.05$ ). A confidence interval has been added around the linear trend.

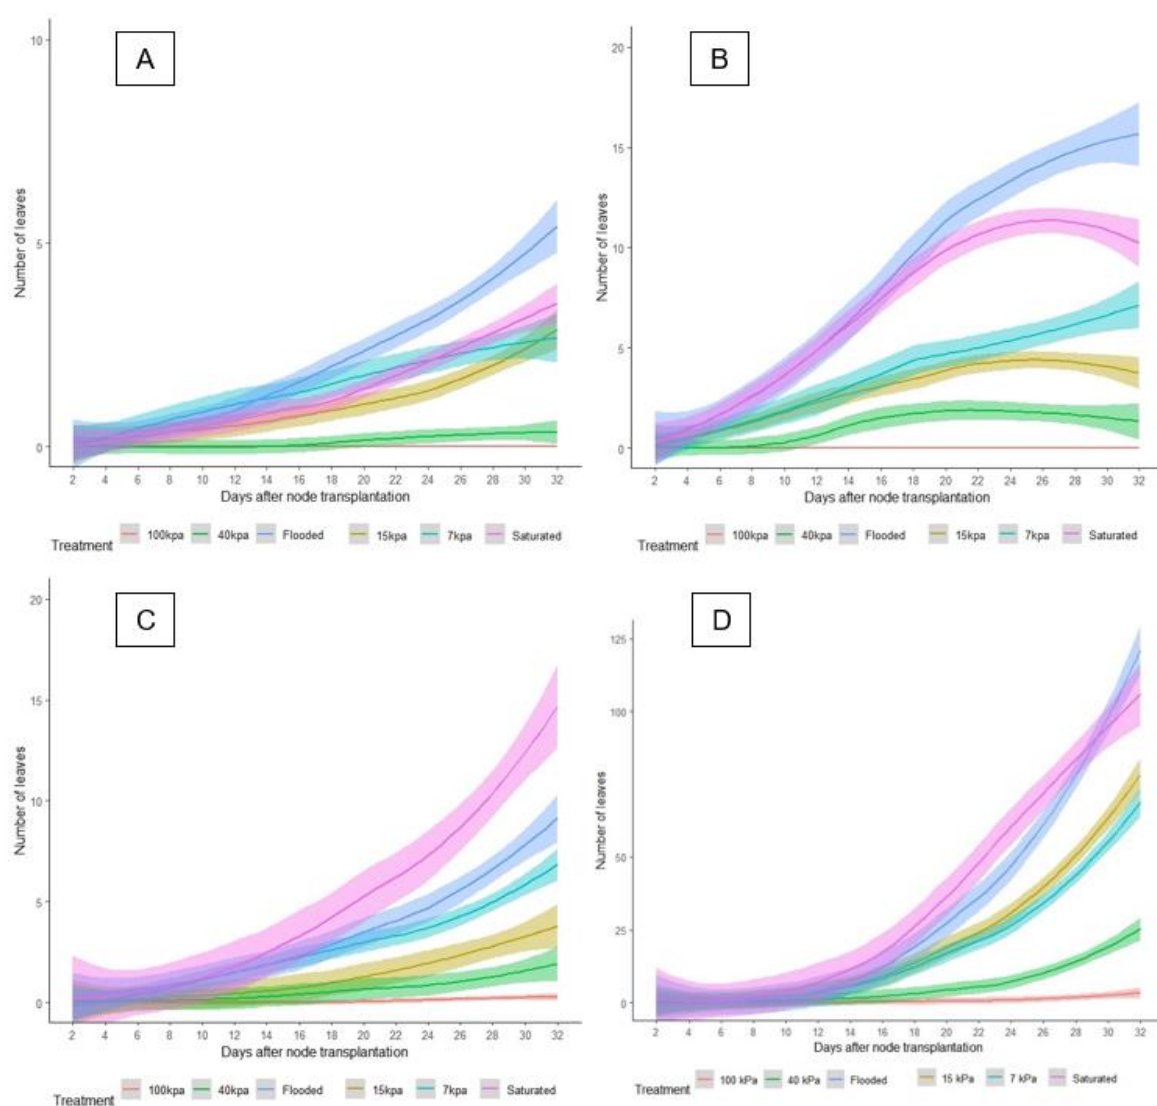

**Figure S2.** Number of leaves of *Leersia hexandra* (A and C) and *Luziola peruviana* (B and D) at different soil moisture levels in 2017/18 (A-B) and 2018/19 (C-D) growing seasons. Smoothing lines represent the observed values ( $n=16$ ) with confidence intervals ( $P \leq 0.05$ ). A confidence interval has been added around the linear trend.

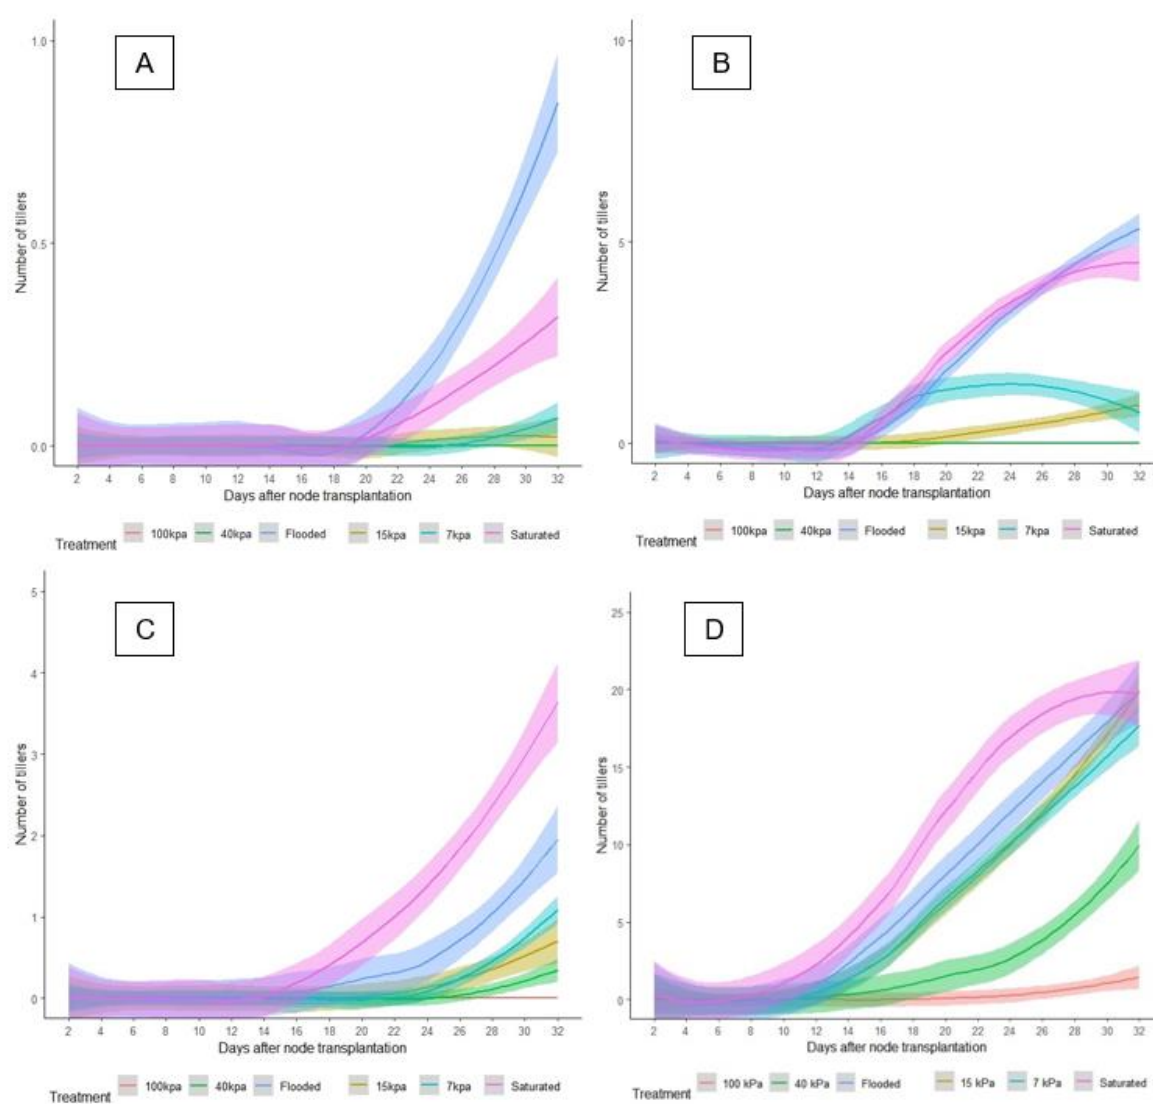

**Figure S3.** Number of tillers of *Leersia hexandra* (A and C) and *Luziola peruviana* (B and D) at different soil moisture levels in 2017/18 (A-B) and 2018/19 (C-D) growing seasons. Smoothing lines represent the observed values ( $n=16$ ) with confidence intervals ( $P \leq 0.05$ ). A confidence interval has been added around the linear trend.
